# Supplementary material for: Levels of Lysozyme and SLPI in Bronchoalveolar Lavage: Exploring Their Role in Interstitial Lung Disease
Source: MDPI journal article supplement (doi:10.3390/ijms25084297), 2024-04-12
Supplement: s1 [file s1]

# Levels of Lysozyme and SLPI in bronchoalveolar lavage: Exploring their role in interstitial lung disease

Rubén Osuna-Gómez<sup>1</sup>, Maria Mulet<sup>1</sup>, Silvia Barril<sup>2-3</sup>, Elisabet Cantó<sup>1</sup>, Paloma Millan-Billi<sup>3-4</sup>, Ana Pardessus<sup>3</sup>, David de la Rosa<sup>3</sup>, Diego Castillo<sup>3#</sup>, Silvia Vidal<sup>1\*</sup>

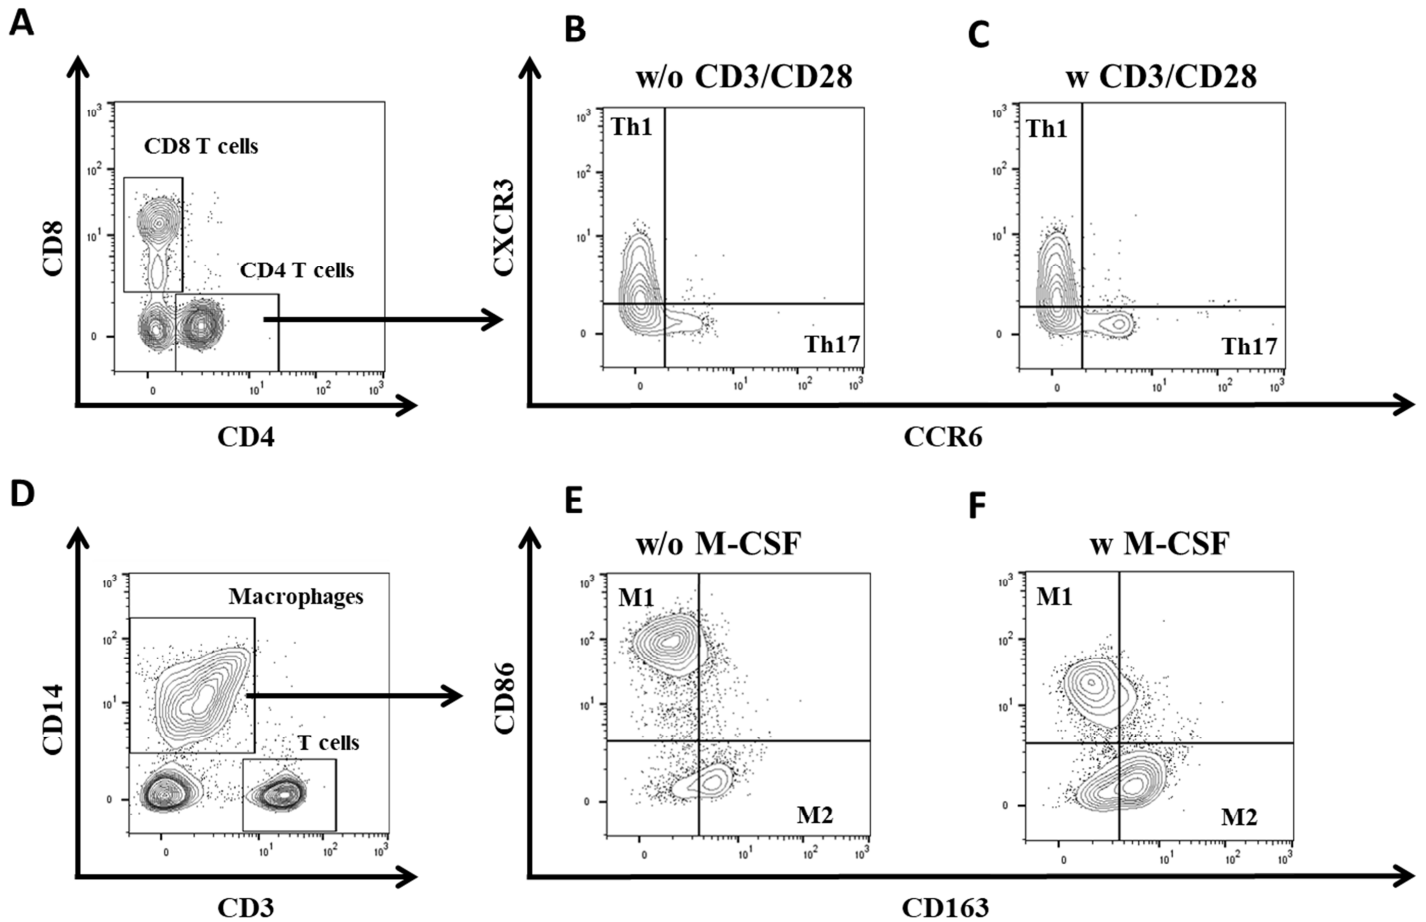

**Figure S1.** Gating strategies for the isolated PBMCs. (A) T cells were gated combining anti-CD8 and anti-CD4, CD8-CD4<sup>+</sup> (CD4<sup>+</sup> T cells) and (B-C) MFI of CXCR3<sup>+</sup> and the MFI of CCR6<sup>+</sup> were analyzed. (D) Macrophages were gated by CD14 expression and (E-F) the percentage of CD86<sup>+</sup> and CD163<sup>+</sup> were analyzed.
